# Supplementary material for: A data-driven health index for neonatal morbidities
Source: PubMed Central journal article supplement — iScience. 2022 Mar 22;25(4):104143. doi: 10.1016/j.isci.2022.104143 (PMC8990172; doi:10.1016/j.isci.2022.104143), 2022-03-22
Supplement: mmc1.pdf [file mmc1.pdf]

iScience, Volume 25

## **Supplemental information**

### **A data-driven health**

#### **index for neonatal morbidities**

**Davide De Francesco, Yair J. Blumenfeld, Ivana Marić, Jonathan A. Mayo, Alan L. Chang, Ramin Fallahzadeh, Thanaphong Phongpreecha, Alex J. Butwick, Maria Xenochristou, Ciaran S. Phibbs, Neda H. Bidoki, Martin Becker, Anthony Culos, Camilo Espinosa, Qun Liu, Karl G. Sylvester, Brice Gaudilliere, Martin S. Angst, David K. Stevenson, Gary M. Shaw, and Nima Aghaeepour**

**Supplementary Table 1. [List of neonatal morbidities and corresponding ICD-9-CM codes, Related to STAR Methods]**

| <b>Neonatal morbidity</b>     | <b>Abbreviation</b> | <b>ICD-9-CM code(s)</b> |
|-------------------------------|---------------------|-------------------------|
| Respiratory distress syndrome | RDS                 | 769                     |
| Intraventricular hemorrhage   | IVH                 | 772.1                   |
| Necrotizing enterocolitis     | NEC                 | 777.5                   |
| Retinopathy of Prematurity    | ROP                 | 362.2                   |
| Bronchopulmonary dysplasia    | BDP                 | 770.7                   |
| Patent ductus arteriosus      | PDA                 | 747.0                   |
| Periventricular leukomalacia  | PVL                 | 779.7                   |
| Sepsis                        |                     | 771.81                  |
| Pulmonary Hemorrhage          |                     | 770.3                   |
| Cerebral palsy                | CP                  | 343                     |
| Pulmonary hypertension        | Pulmonary HTN       | 416.0                   |
| Jaundice                      |                     | 774; 277.4              |

**Supplementary Table 2. [Clinical variables used to predict neonatal morbidities, Related to STAR Methods]**

| <b>Variable</b>                         | <b>Source(s)</b>  | <b>Median (IQR) or<br/>n (%)</b> | <b>n (%) of missing</b> |
|-----------------------------------------|-------------------|----------------------------------|-------------------------|
| <b>Maternal demographics</b>            |                   |                                  |                         |
| Age [years]                             | Birth certificate | 28 (23, 32)                      | 402 (<1%)               |
| Race                                    | Birth certificate |                                  | 107,972 (<1%)           |
| <i>Non-Hispanic White</i>               |                   | 3,661,238 (32%)                  |                         |
| <i>Non-Hispanic Black</i>               |                   | 729,663 (6%)                     |                         |
| <i>Asian</i>                            |                   | 1,286,066 (11%)                  |                         |
| <i>Pacific Islander</i>                 |                   | 59,714 (<1%)                     |                         |
| <i>Hispanic</i>                         |                   | 5,690,623 (49%)                  |                         |
| <i>American Indian/Alaskan</i>          |                   | 51,741 (<1%)                     |                         |
| <i>Other</i>                            |                   | 7,769 (<1%)                      |                         |
| BMI                                     | Birth certificate |                                  | 8,766,133 (76%)         |
| <i>Underweight</i>                      |                   | 115,280 (1%)                     |                         |
| <i>Normal</i>                           |                   | 1,402,154 (12%)                  |                         |
| <i>Overweight</i>                       |                   | 728,383 (6%)                     |                         |
| <i>Obese</i>                            |                   | 582,836 (5%)                     |                         |
| Education level                         | Birth certificate |                                  | 241,330 (2%)            |
| <i>Some high school or less</i>         |                   | 3,448,416 (30%)                  |                         |
| <i>Highschool diploma or equivalent</i> |                   | 3,146,483 (27%)                  |                         |
| <i>Some college</i>                     |                   | 2,333,925 (20%)                  |                         |
| <i>College graduate or more</i>         |                   | 2,424,632 (21%)                  |                         |
| Payer status                            | Birth certificate |                                  | 27,753 (<1%)            |
| <i>Medi-Cal</i>                         |                   | 5,296,259 (46%)                  |                         |

|                                                |                                                                                                                                                         |                 |                |
|------------------------------------------------|---------------------------------------------------------------------------------------------------------------------------------------------------------|-----------------|----------------|
| <i>Private</i>                                 |                                                                                                                                                         | 5,785,390 (50%) |                |
| <i>Self-pay, none, or medically unattended</i> |                                                                                                                                                         | 286,899 (2%)    |                |
| <i>Other</i>                                   |                                                                                                                                                         | 198,485 (2%)    |                |
| Parity                                         | Birth certificate                                                                                                                                       |                 | 8,984 (<1%)    |
| 0                                              |                                                                                                                                                         | 4,511,516 (39%) |                |
| 1                                              |                                                                                                                                                         | 3,643,736 (31%) |                |
| 2                                              |                                                                                                                                                         | 1,979,760 (17%) |                |
| 3+                                             |                                                                                                                                                         | 1450790 (13%)   |                |
| <b>Maternal medical history</b>                |                                                                                                                                                         |                 |                |
| Hypertension                                   | ICD-9-CM codes 401-405, 642.0-642.2, 642.9 (not concomitant with preeclampsia and gestational hypertension)                                             | 122,007 (1%)    | 80,627 (<1%)   |
| Pre-gestational diabetes mellitus (DM)         | ICD-9-CM codes 250.0x, 250.1x, 250.2x, 250.3x, 648.0 (not concomitant with gestational diabetes)                                                        | 87,343 (<1%)    | 80,627 (<1%)   |
| Smoking (during or 3 months before pregnancy)  | Birth certificate and ICD-9-CM codes 305.1, 649.0                                                                                                       | 196,613 (2%)    | 63,422 (<1%)   |
| Asthma                                         | ICD-9-CM code 493                                                                                                                                       | 163,209 (1%)    | 80,627 (<1%)   |
| Anemia                                         | ICD-9-CM codes 280-285, 648.2                                                                                                                           | 870,469 (8%)    | 80,627 (<1%)   |
| Rheumatoid Arthritis (RA)                      | ICD-9-CM codes 714                                                                                                                                      | 4,736 (<1%)     | 80,627 (<1%)   |
| <b>Obstetrical complications</b>               |                                                                                                                                                         |                 |                |
| Gestational age (GA) at delivery [days]        | Birth certificate                                                                                                                                       | 276 (268, 282)  | 1,029,583 (9%) |
| Preeclampsia and gestational HTN               | ICD-9-CM codes 642.4, 642.5, 642.6, 642.7, 642.3                                                                                                        | 559,007 (5%)    | 80,627 (<1%)   |
| Gestational diabetes mellitus (GDM)            | ICD-9-CM code 648.8                                                                                                                                     | 558,944 (5%)    | 80,627 (<1%)   |
| Spontaneous pre-term birth (PTB)               | Gestational age <37 weeks and ICD-9-CM codes 644, 658.1 or mention of premature rupture of membranes, premature labor or tocolysis in birth certificate | 602,545 (5%)    | 1,029,583 (9%) |
| Medically indicated pre-term birth (PTB)       | Gestational age <37 weeks and ICD-9-CM codes 73.0, 73.1, 73.4, 74 or mention of medical induction, artificial rupture of                                | 783,129 (7%)    | 1,029,583 (9%) |

|                                   |                                                                                                                 |                   |                 |
|-----------------------------------|-----------------------------------------------------------------------------------------------------------------|-------------------|-----------------|
|                                   | membranes, or cesarean delivery in birth certificate                                                            |                   |                 |
| Unclassified pre-term birth (PTB) | Gestational age <37 weeks and not concomitant with codes used to define spontaneous and medically indicated PTB | 254,293 (2%)      | 1,029,583 (9%)  |
| Cesarean delivery (CS)            | Birth certificate and ICD-9-CM code 74                                                                          | 3,176,350 (27%)   | 0 (0%)          |
| Operative vaginal delivery (OVD)  | Birth certificate (mention of forceps or vacuum delivery)                                                       | 195,031 (2%)      | 7,440,071 (64%) |
| Postpartum hemorrhage (PPH)       | ICD-9-CM code 666                                                                                               | 286,858 (2%)      | 80,627 (<1%)    |
| Chorioamnionitis                  | ICD-9-CM code 658.4                                                                                             | 237,782 (2%)      | 80,627 (<1%)    |
| Small for gestational age (SGA)   | Birthweight <10 <sup>th</sup> percentile for gestational age and sex‡                                           | 1,097,366 (9%)    | 621,672 (5%)    |
| <b>Obstetrical history</b>        |                                                                                                                 |                   |                 |
| Prior stillbirth                  | Birth certificate                                                                                               | 145,930 (1%)      | 9,375 (<1%)     |
| Prior miscarriage                 | Birth certificate                                                                                               | 1,893,525 (16%)   | 8,969 (<1%)     |
| <b>Prenatal fetal findings</b>    |                                                                                                                 |                   |                 |
| Infant sex                        | Birth certificate                                                                                               |                   | 113 (<1%)       |
| <i>Male</i>                       |                                                                                                                 | 5,929,249 (51%)   |                 |
| <i>Female</i>                     |                                                                                                                 | 5,665,424 (49%)   |                 |
| Birthweight [Kg]                  | Birth certificate                                                                                               | 3.37 (3.03, 3.69) | 12,290 (<1%)    |

‡ According to Talge NM, Mudd LM, Sikorskii A, Basso O. United States birth weight reference corrected for implausible gestational age estimates. *Pediatrics*. 2014 May 1;133(5):844-53.

**Supplementary Table 3. [Performance of the five ensemble methods, Related to STAR Methods]** AUPRC and AUC of the five ensemble methods to predict neonatal morbidities (for each morbidity, the highest AUPRC/AUC is shown in bold)

|                | AUPRC           |                  |                    |                     |          | AUC          |                  |                    |                     |       |
|----------------|-----------------|------------------|--------------------|---------------------|----------|--------------|------------------|--------------------|---------------------|-------|
|                | Average         | Weighted average | Stacked prediction | Logistic regression | NN       | Average      | Weighted average | Stacked prediction | Logistic regression | NN    |
| RDS            | 0.383           | 0.412            | <b>0.421</b>       | 0.392               | 0.381    | 0.896        | 0.903            | <b>0.913</b>       | 0.894               | 0.901 |
| IVH            | 0.154           | <b>0.158</b>     | 0.158              | 0.150               | 0.149    | 0.957        | 0.960            | <b>0.962</b>       | 0.958               | 0.953 |
| NEC            | 0.048           | <b>0.049</b>     | 0.049              | 0.047               | 0.046    | 0.939        | 0.943            | <b>0.946</b>       | 0.944               | 0.933 |
| ROP            | 0.248           | 0.261            | <b>0.262</b>       | 0.255               | 0.245    | 0.990        | 0.991            | <b>0.991</b>       | 0.989               | 0.985 |
| BPD            | 0.197           | 0.204            | <b>0.205</b>       | 0.199               | 0.192    | 0.983        | 0.983            | <b>0.984</b>       | 0.983               | 0.976 |
| PDA            | 0.170           | 0.179            | <b>0.180</b>       | 0.170               | 0.166    | 0.776        | 0.779            | <b>0.787</b>       | 0.780               | 0.777 |
| PVL            | 0.009           | 0.009            | <b>0.009</b>       | 0.008               | 0.009    | 0.960        | <b>0.963</b>     | 0.951              | 0.962               | 0.956 |
| Sepsis         | 0.109           | 0.116            | <b>0.122</b>       | 0.116               | 0.117    | 0.797        | 0.806            | <b>0.839</b>       | 0.832               | 0.828 |
| Pulmonary hem. | 0.028           | <b>0.029</b>     | 0.028              | 0.025               | 0.026    | 0.879        | <b>0.882</b>     | 0.880              | 0.876               | 0.873 |
| CP             | <b>2.8 E-04</b> | 1.9 E-04         | 1.0 E-04           | 1.6 E-04            | 1.3 E-05 | <b>0.729</b> | 0.722            | 0.660              | 0.716               | 0.294 |
| Pulmonary HTN  | 1.1 E-03        | <b>1.2 E-03</b>  | 1.1 E-03           | 9.9 E-04            | 1.1 E-03 | 0.779        | <b>0.788</b>     | 0.785              | 0.779               | 0.775 |
| Jaundice       | 0.306           | 0.325            | <b>0.333</b>       | 0.325               | 0.324    | 0.686        | 0.701            | <b>0.715</b>       | 0.714               | 0.706 |
| <b>Overall</b> | 0.281           | 0.311            | <b>0.326</b>       | 0.305               | 0.312    | 0.958        | 0.961            | <b>0.963</b>       | 0.960               | 0.961 |

**Supplementary Table 4 [Performance of the deep NN and standard approaches, Related to STAR Methods]** AUPRC and AUC of the deep NN model, standard multivariable logistic regression, multi-task logistic regression and multivariate random forest to predict neonatal morbidities (for each morbidity, the highest AUPRC/AUC is shown in bold)

|                | AUPRC           |                     |                                |                            | AUC          |                     |                                |                            |
|----------------|-----------------|---------------------|--------------------------------|----------------------------|--------------|---------------------|--------------------------------|----------------------------|
|                | Deep NN         | Logistic regression | Multi-task logistic regression | Multivariate random forest | Deep NN      | Logistic regression | Multi-task logistic regression | Multivariate random forest |
| RDS            | <b>0.421</b>    | 0.409               | 0.126                          | 0.401                      | <b>0.913</b> | 0.908               | 0.801                          | 0.885                      |
| IVH            | <b>0.158</b>    | 0.146               | 0.048                          | 0.131                      | <b>0.962</b> | 0.959               | 0.899                          | 0.925                      |
| NEC            | <b>0.049</b>    | 0.045               | 0.015                          | 0.032                      | <b>0.946</b> | 0.938               | 0.866                          | 0.864                      |
| ROP            | <b>0.262</b>    | 0.240               | 0.074                          | 0.254                      | <b>0.991</b> | 0.989               | 0.947                          | 0.978                      |
| BPD            | <b>0.205</b>    | 0.185               | 0.048                          | 0.191                      | <b>0.984</b> | 0.975               | 0.939                          | 0.959                      |
| PDA            | <b>0.180</b>    | 0.169               | 0.060                          | 0.167                      | <b>0.787</b> | 0.777               | 0.695                          | 0.751                      |
| PVL            | <b>0.009</b>    | 0.005               | 0.002                          | 0.003                      | <b>0.951</b> | 0.877               | 0.891                          | 0.701                      |
| Sepsis         | <b>0.122</b>    | 0.094               | 0.027                          | 0.081                      | <b>0.839</b> | 0.798               | 0.622                          | 0.739                      |
| Pulmonary hem. | <b>0.028</b>    | 0.023               | 0.005                          | 0.016                      | <b>0.880</b> | 0.854               | 0.808                          | 0.769                      |
| CP             | <b>1.0 E-04</b> | 2.1 E-05            | 9.1 E-05                       | 1.8 E-05                   | <b>0.660</b> | 0.467               | 0.595                          | 0.503                      |
| Pulmonary HTN  | <b>1.1 E-03</b> | 8.6 E-04            | 4.9 E-04                       | 1.8 E-04                   | <b>0.785</b> | 0.719               | 0.611                          | 0.525                      |
| Jaundice       | <b>0.333</b>    | 0.318               | 0.160                          | 0.306                      | <b>0.715</b> | 0.704               | 0.523                          | 0.668                      |
| <b>Overall</b> | <b>0.326</b>    | 0.310               | 0.130                          | 0.266                      | <b>0.963</b> | 0.961               | 0.935                          | 0.878                      |

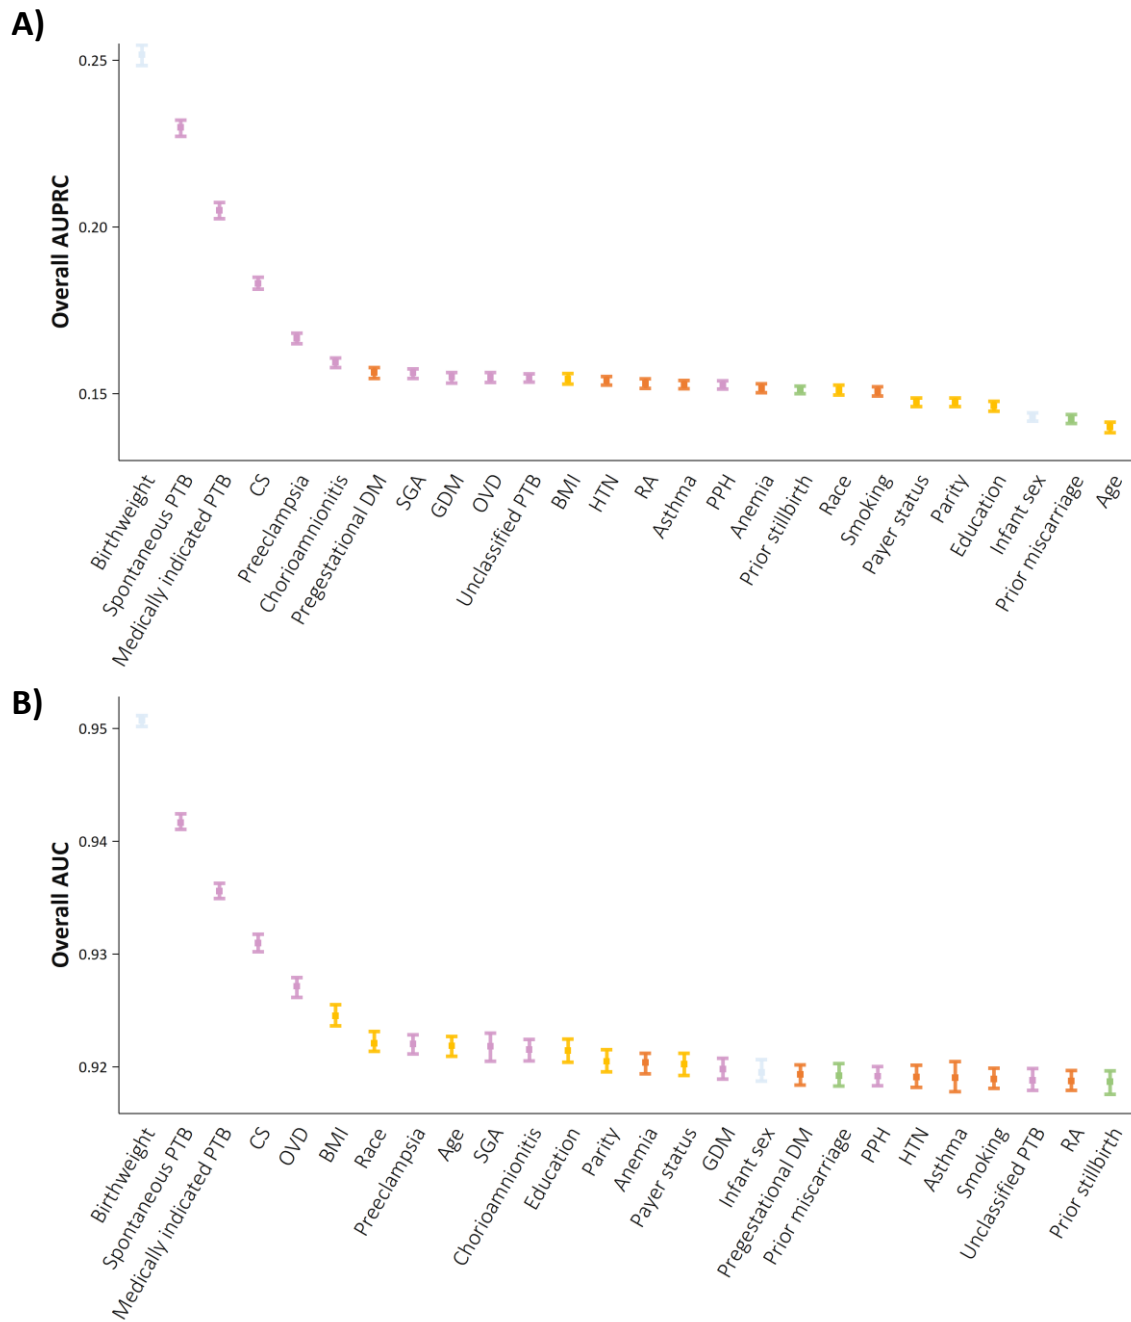

**Supplementary Figure 1. [Univariable AUPRC and AUC for each feature, Related to STAR Methods]** Overall test AUPRC (A) and AUC (B), with 95% confidence intervals, to predict the twelve neonatal morbidities of univariable logistic regression models considering one clinical variable at the time.



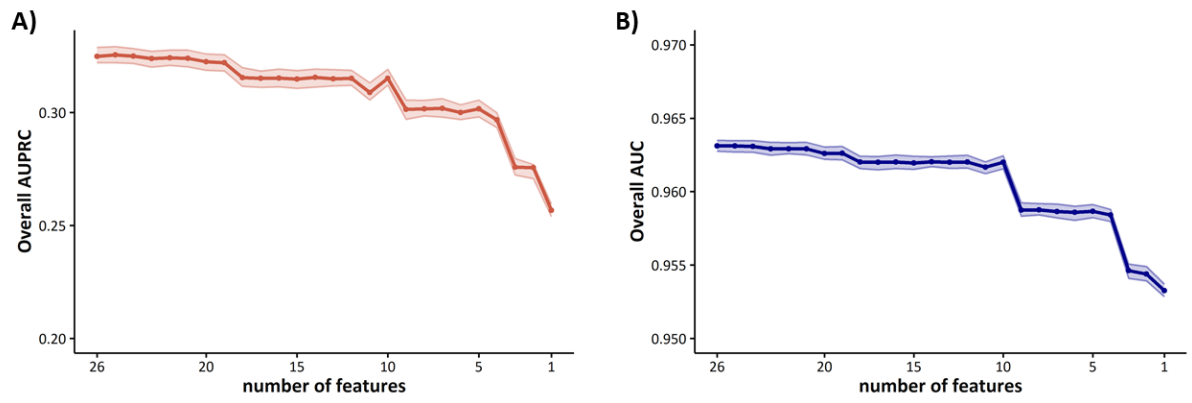

**Supplementary Figure 2. [AUPRC and AUC by number of features, Related to STAR Methods]** Overall test AUPRC (A) and AUC (B), with 95% confidence intervals, to predict the twelve neonatal morbidities of the model by number of clinical variables (features) included in the model.

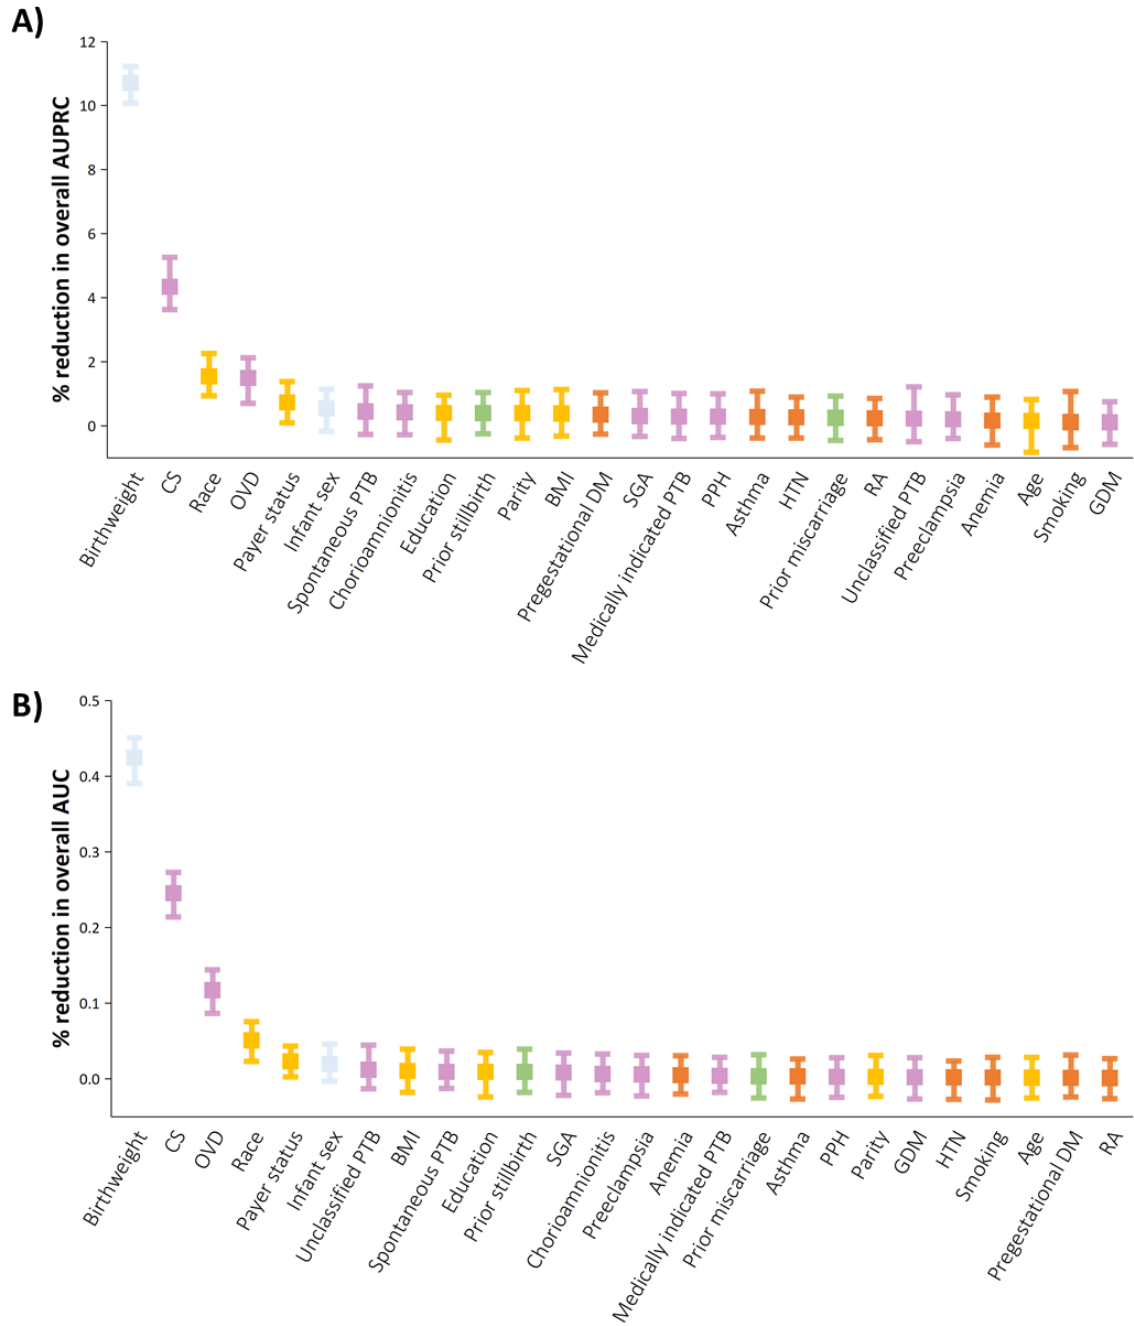

**Supplementary Figure 3. [Feature permutation experiment, Related to STAR Methods]** Percentage reduction (with 95% confidence interval) in the overall test AUPRC (A) and AUC (B) to predict the twelve neonatal morbidities of the model when randomly permuting each clinical variable (one at the time) compared to the original model.

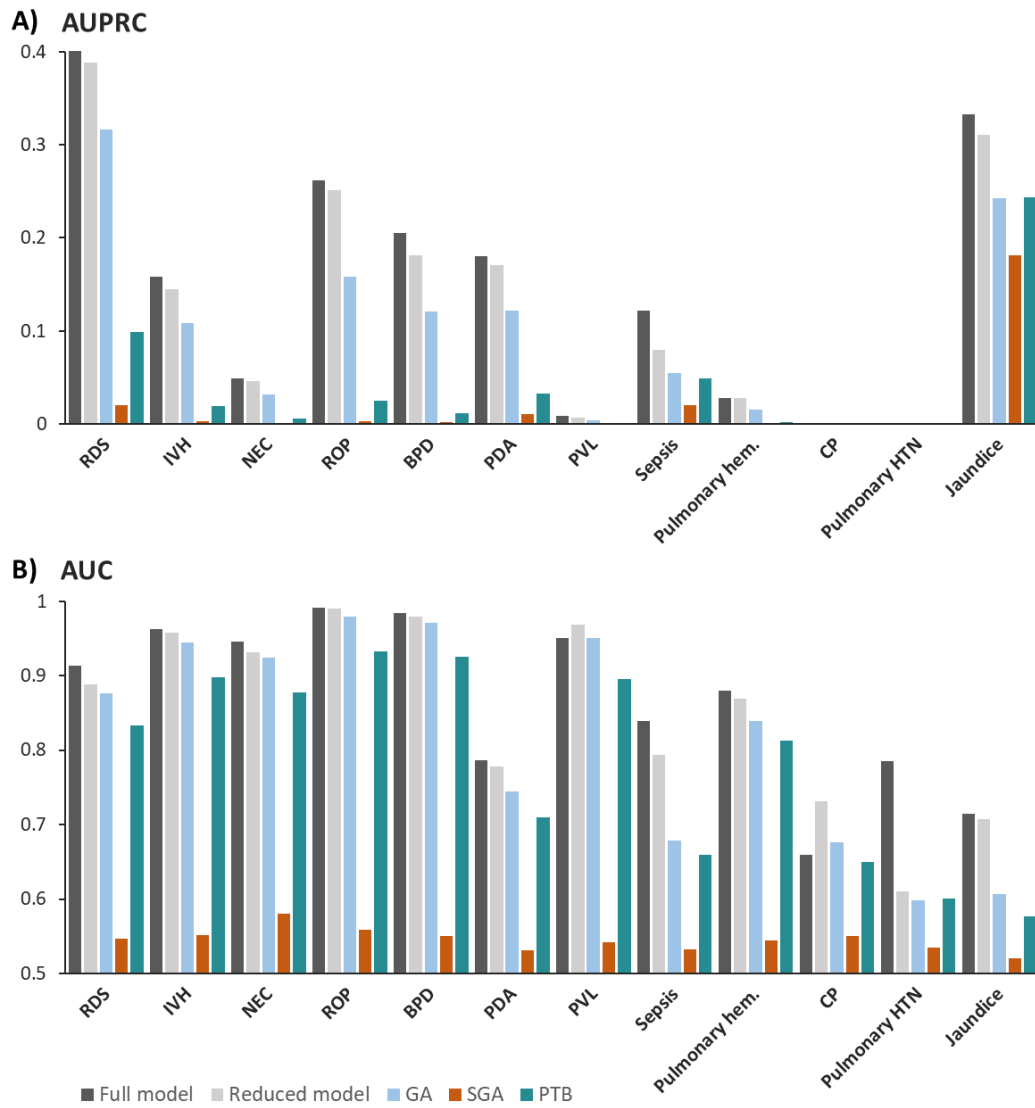

**Supplementary Figure 4. [Performance of the full model, the reduced model, GA, SGA and PTB, Related to STAR Methods] Test AUPRC (A) and AUC (B) for each neonatal morbidity of the full model, the reduced model, GA, SGA and PTB**

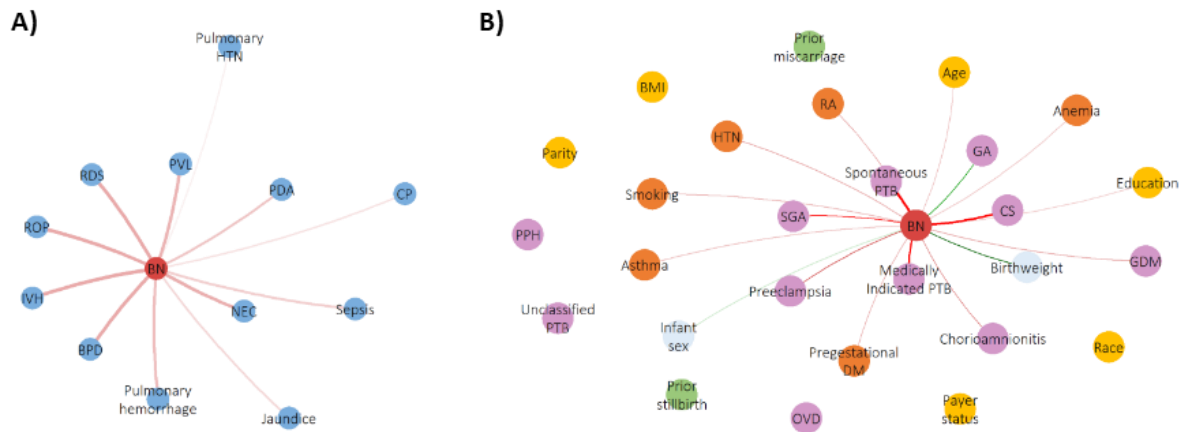

**Supplementary Figure 5. [Correlation of the one-dimensional score with neonatal morbidities and clinical variables, Related to STAR Methods]** Correlation network between neonatal morbidities (A) and clinical variables (B) with the outputs of the single-unit bottleneck layer; edges are drawn between pairs of morbidities/clinical variables and bottleneck layer unit that are correlated with an absolute value of the correlation coefficient exceeding 0.1, green (red) edges indicate positive (negative) correlations, the width of the edges is proportional to the Pearson's correlation coefficient.

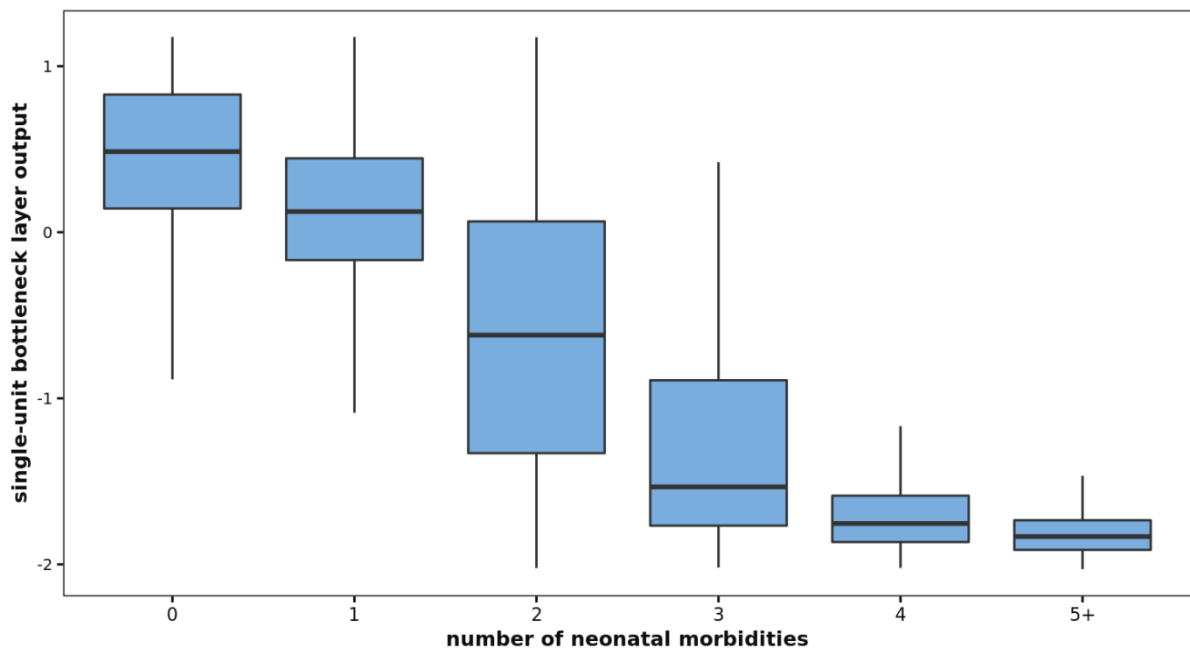

**Supplementary Figure 6. [The one-dimensional score by the number of neonatal morbidities, Related to STAR Methods]** Output of the single-unit bottleneck layer (y-axis) by number of neonatal morbidities observed in a livebirth

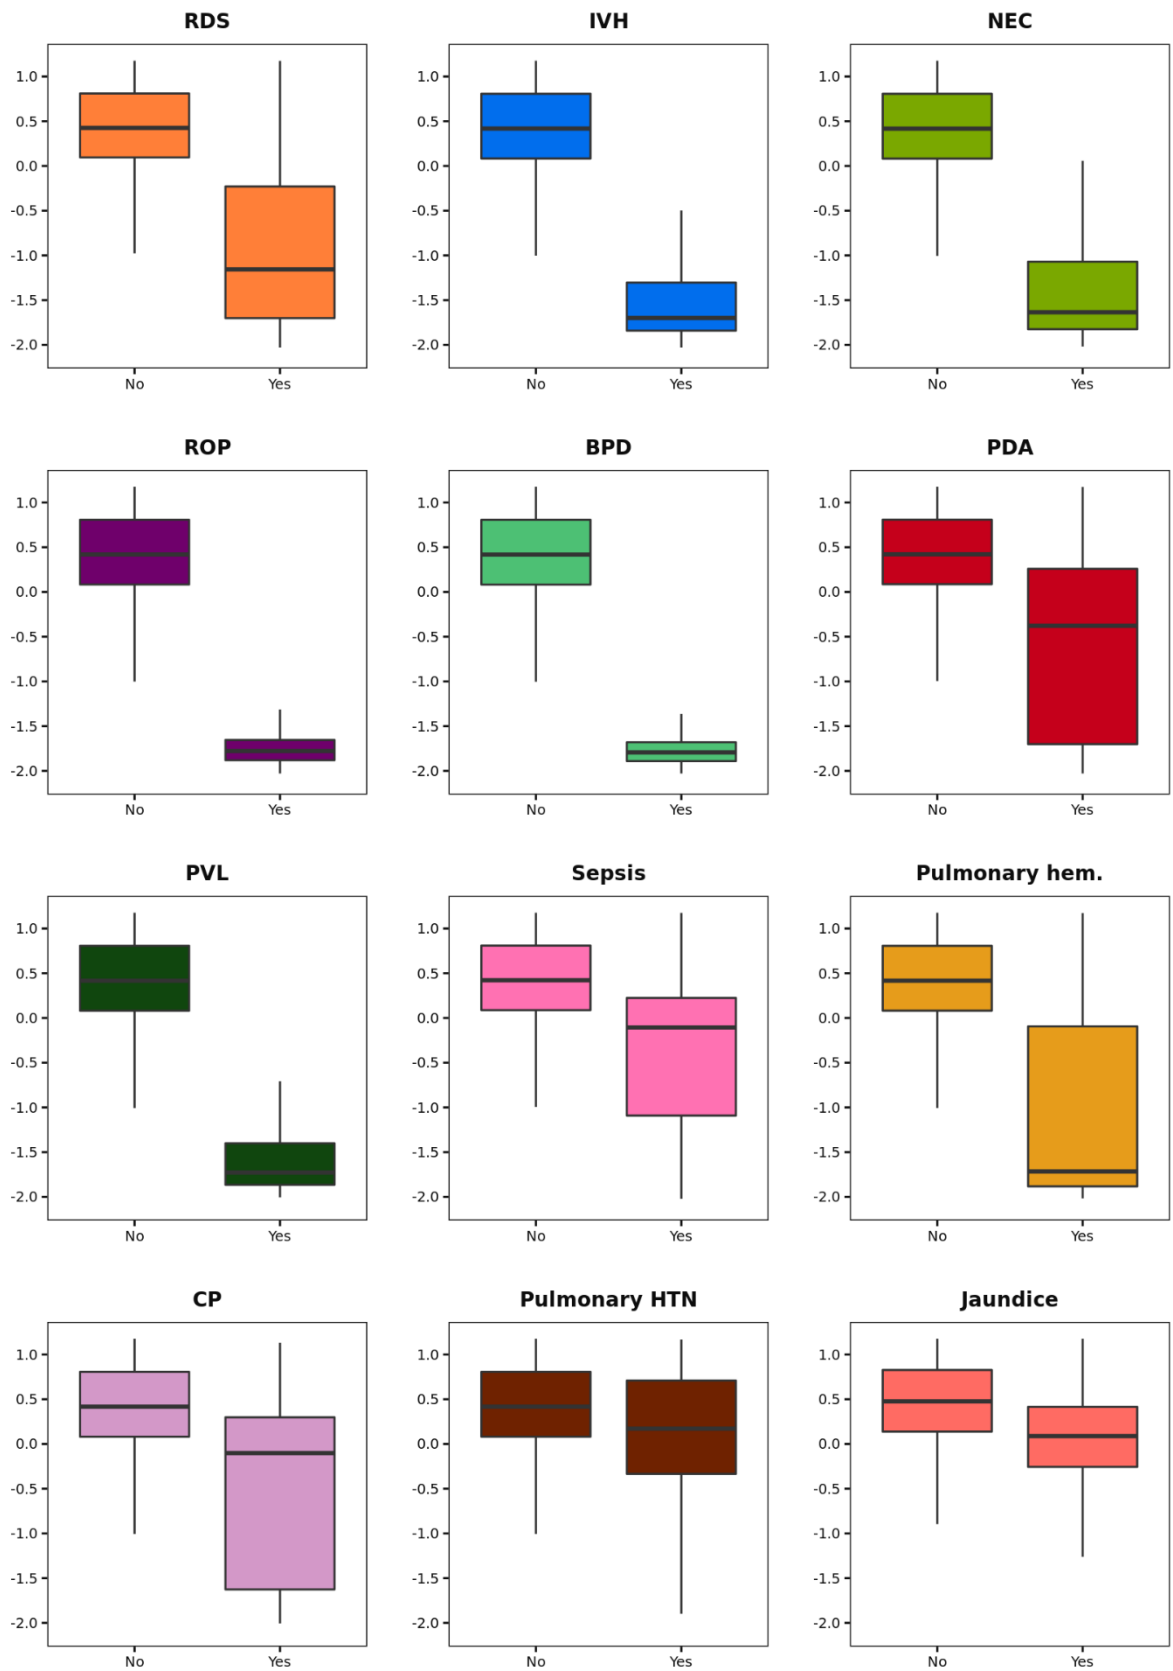

**Supplementary Figure 7. [The one-dimensional score vs each neonatal morbidity, Related to STAR Methods]**  
 Output of the single-unit bottleneck layer (y-axis) in livebirths with and without each of the twelve neonatal morbidities

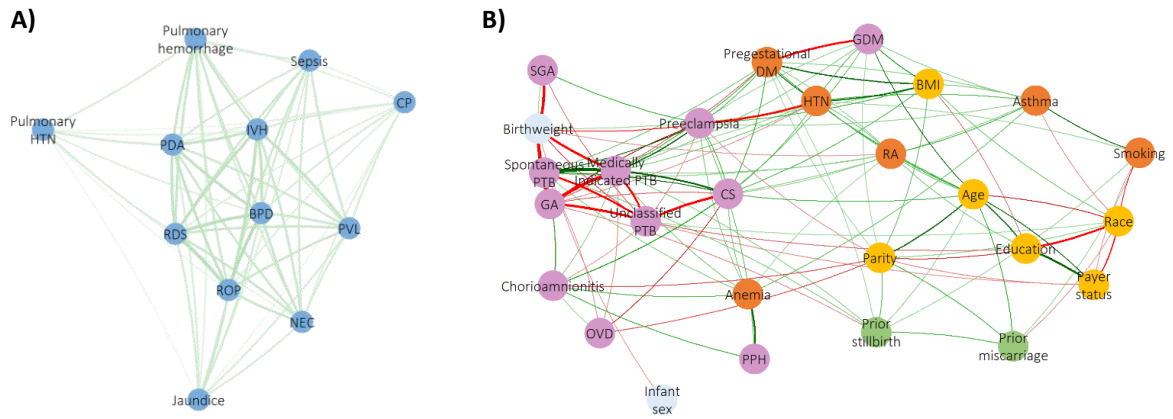

**Supplementary Figure 8. [Correlation networks of neonatal morbidities and clinical variables, Related to STAR Methods]** Correlation networks between morbidities (A) and clinical variables (B). Edges are drawn between pairs of morbidities/clinical variables that are correlated with the absolute value of the correlation coefficient exceeding 0.1; green (red) edges indicate positive (negative) correlations; the width of the edges is proportional to the Pearson's correlation coefficient.

**Supplementary Table 5. [AUPRC of the full model, reduced model and GA, SGA, and PTB, Related to Figure 2]** AUPRC in the test dataset of the full and reduced models and models based on GA, SGA and PTB

|                | AUPRC ( $\pm$ SE)         |                           |                           |                           |                           |                   |
|----------------|---------------------------|---------------------------|---------------------------|---------------------------|---------------------------|-------------------|
|                | Full model                | Reduced model             | Gestational age           | SGA                       | PTB                       | Random classifier |
| RDS            | 0.421 ( $\pm 1.8E-04$ )   | 0.389 ( $\pm 1.8E-04$ )   | 0.316 ( $\pm 1.7E-04$ )   | 0.020 ( $\pm 5.1E-05$ )   | 0.099 ( $\pm 1.1E-04$ )   | 0.015             |
| IVH            | 0.158 ( $\pm 1.3E-04$ )   | 0.144 ( $\pm 1.3E-04$ )   | 0.108 ( $\pm 1.1E-04$ )   | 0.003 ( $\pm 2.0E-05$ )   | 0.019 ( $\pm 5.0E-05$ )   | 0.002             |
| NEC            | 0.049 ( $\pm 7.8E-05$ )   | 0.046 ( $\pm 7.6E-05$ )   | 0.032 ( $\pm 6.3E-05$ )   | 0.001 ( $\pm 1.2E-05$ )   | 0.006 ( $\pm 2.8E-05$ )   | 0.001             |
| ROP            | 0.262 ( $\pm 1.6E-04$ )   | 0.252 ( $\pm 1.6E-04$ )   | 0.158 ( $\pm 1.3E-04$ )   | 0.003 ( $\pm 2.1E-05$ )   | 0.025 ( $\pm 5.7E-05$ )   | 0.002             |
| BPD            | 0.205 ( $\pm 1.5E-04$ )   | 0.181 ( $\pm 1.4E-04$ )   | 0.121 ( $\pm 1.2E-04$ )   | 0.002 ( $\pm 1.5E-05$ )   | 0.012 ( $\pm 3.9E-05$ )   | 0.001             |
| PDA            | 0.180 ( $\pm 1.4E-04$ )   | 0.171 ( $\pm 1.4E-04$ )   | 0.122 ( $\pm 1.2E-04$ )   | 0.011 ( $\pm 3.8E-05$ )   | 0.033 ( $\pm 6.5E-05$ )   | 0.008             |
| PVL            | 0.009 ( $\pm 3.5E-05$ )   | 0.007 ( $\pm 3.0E-05$ )   | 0.004 ( $\pm 2.3E-05$ )   | 0.000 ( $\pm 4.9E-06$ )   | 0.001 ( $\pm 1.3E-05$ )   | 7.4E-05           |
| Sepsis         | 0.122 ( $\pm 1.2E-04$ )   | 0.079 ( $\pm 9.8E-05$ )   | 0.055 ( $\pm 8.2E-05$ )   | 0.020 ( $\pm 5.1E-05$ )   | 0.049 ( $\pm 7.8E-05$ )   | 0.009             |
| Pulmonary hem. | 0.028 ( $\pm 6.0E-05$ )   | 0.028 ( $\pm 6.0E-05$ )   | 0.015 ( $\pm 4.4E-05$ )   | 0.000 ( $\pm 7.3E-06$ )   | 0.002 ( $\pm 1.6E-05$ )   | 0.0003            |
| CP             | 1.0E-04 ( $\pm 3.6E-06$ ) | 2.9E-04 ( $\pm 6.2E-06$ ) | 2.2E-04 ( $\pm 5.3E-06$ ) | 2.3E-05 ( $\pm 1.8E-06$ ) | 4.4E-05 ( $\pm 2.4E-06$ ) | 1.9E-05           |
| Pulmonary HTN  | 0.0011 ( $\pm 1.2E-05$ )  | 0.0006 ( $\pm 9.0E-06$ )  | 0.0006 ( $\pm 8.8E-06$ )  | 0.0002 ( $\pm 4.5E-06$ )  | 0.0002 ( $\pm 5.2E-06$ )  | 2.1E-04           |
| Jaundice       | 0.333 ( $\pm 1.7E-04$ )   | 0.310 ( $\pm 1.7E-04$ )   | 0.243 ( $\pm 1.6E-04$ )   | 0.181 ( $\pm 1.4E-04$ )   | 0.244 ( $\pm 1.6E-04$ )   | 0.135             |

Note: SE: standard error; random classifier: prediction model that predicts neonatal morbidities completely at random

**Supplementary Table 6 [AUC of the full model, reduced model and GA, SGA, and PTB, Related to STAR Methods]** AUC in the test dataset of the full and reduced models and models based on GA, SGA and PTB

|                | AUC ( $\pm$ SE)         |                         |                         |                         |                         |
|----------------|-------------------------|-------------------------|-------------------------|-------------------------|-------------------------|
|                | Full model              | Reduced model           | Gestational age         | SGA                     | PTB                     |
| RDS            | 0.913 ( $\pm 5.5E-04$ ) | 0.889 ( $\pm 6.3E-04$ ) | 0.876 ( $\pm 7.3E-04$ ) | 0.547 ( $\pm 6.0E-04$ ) | 0.833 ( $\pm 6.5E-04$ ) |
| IVH            | 0.962 ( $\pm 1.0E-03$ ) | 0.958 ( $\pm 1.1E-03$ ) | 0.945 ( $\pm 1.4E-03$ ) | 0.552 ( $\pm 1.7E-03$ ) | 0.898 ( $\pm 1.3E-03$ ) |
| NEC            | 0.946 ( $\pm 2.0E-03$ ) | 0.931 ( $\pm 2.4E-03$ ) | 0.924 ( $\pm 2.5E-03$ ) | 0.580 ( $\pm 3.0E-03$ ) | 0.877 ( $\pm 2.4E-03$ ) |
| ROP            | 0.991 ( $\pm 4.3E-04$ ) | 0.990 ( $\pm 4.3E-04$ ) | 0.979 ( $\pm 7.6E-04$ ) | 0.559 ( $\pm 1.7E-03$ ) | 0.933 ( $\pm 7.0E-04$ ) |
| BPD            | 0.984 ( $\pm 8.0E-04$ ) | 0.979 ( $\pm 9.6E-04$ ) | 0.971 ( $\pm 1.2E-03$ ) | 0.551 ( $\pm 2.1E-03$ ) | 0.925 ( $\pm 1.1E-03$ ) |
| PDA            | 0.787 ( $\pm 1.1E-03$ ) | 0.778 ( $\pm 1.1E-03$ ) | 0.745 ( $\pm 1.3E-03$ ) | 0.531 ( $\pm 7.5E-04$ ) | 0.710 ( $\pm 1.0E-03$ ) |
| PVL            | 0.951 ( $\pm 6.4E-03$ ) | 0.968 ( $\pm 3.8E-03$ ) | 0.950 ( $\pm 6.2E-03$ ) | 0.542 ( $\pm 8.5E-03$ ) | 0.896 ( $\pm 6.6E-03$ ) |
| Sepsis         | 0.839 ( $\pm 7.5E-04$ ) | 0.794 ( $\pm 8.3E-04$ ) | 0.679 ( $\pm 1.2E-03$ ) | 0.532 ( $\pm 7.2E-04$ ) | 0.659 ( $\pm 9.5E-04$ ) |
| Pulmonary hem. | 0.880 ( $\pm 4.8E-03$ ) | 0.869 ( $\pm 5.0E-03$ ) | 0.839 ( $\pm 6.3E-03$ ) | 0.545 ( $\pm 4.3E-03$ ) | 0.813 ( $\pm 4.8E-03$ ) |
| CP             | 0.660 ( $\pm 2.8E-02$ ) | 0.731 ( $\pm 2.6E-02$ ) | 0.676 ( $\pm 2.8E-02$ ) | 0.551 ( $\pm 1.7E-02$ ) | 0.650 ( $\pm 2.1E-02$ ) |
| Pulmonary HTN  | 0.785 ( $\pm 5.4E-03$ ) | 0.611 ( $\pm 8.1E-03$ ) | 0.598 ( $\pm 9.2E-03$ ) | 0.535 ( $\pm 4.9E-03$ ) | 0.601 ( $\pm 6.3E-03$ ) |
| Jaundice       | 0.715 ( $\pm 2.8E-04$ ) | 0.708 ( $\pm 2.8E-04$ ) | 0.607 ( $\pm 3.3E-04$ ) | 0.520 ( $\pm 1.8E-04$ ) | 0.577 ( $\pm 2.3E-04$ ) |

Note: SE: standard error; AUC of a random classifier is 0.5



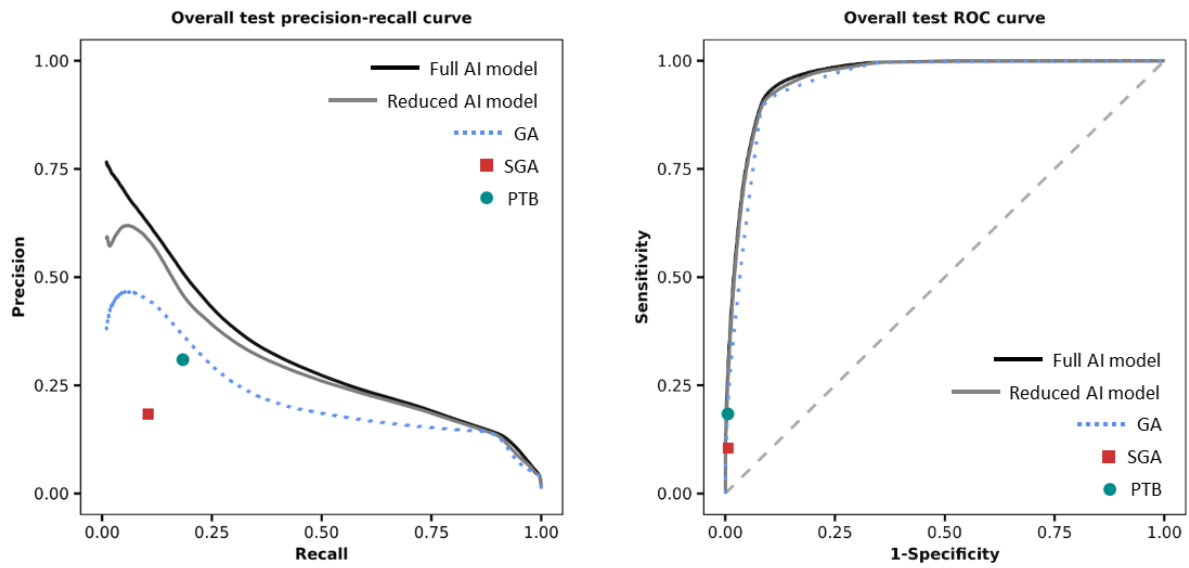

**Supplementary Figure 9. [Overall performance, Related to Figure 1]** Overall precision-recall curve (left) and receiver operating characteristic curve (right) in the test dataset. Overall curves were obtained by stacking the vectors of risk predictions returned by each model and the vectors of observed morbidities to form two vectors combining risk predictions and observed morbidities, respectively, across the twelve neonatal morbidities.

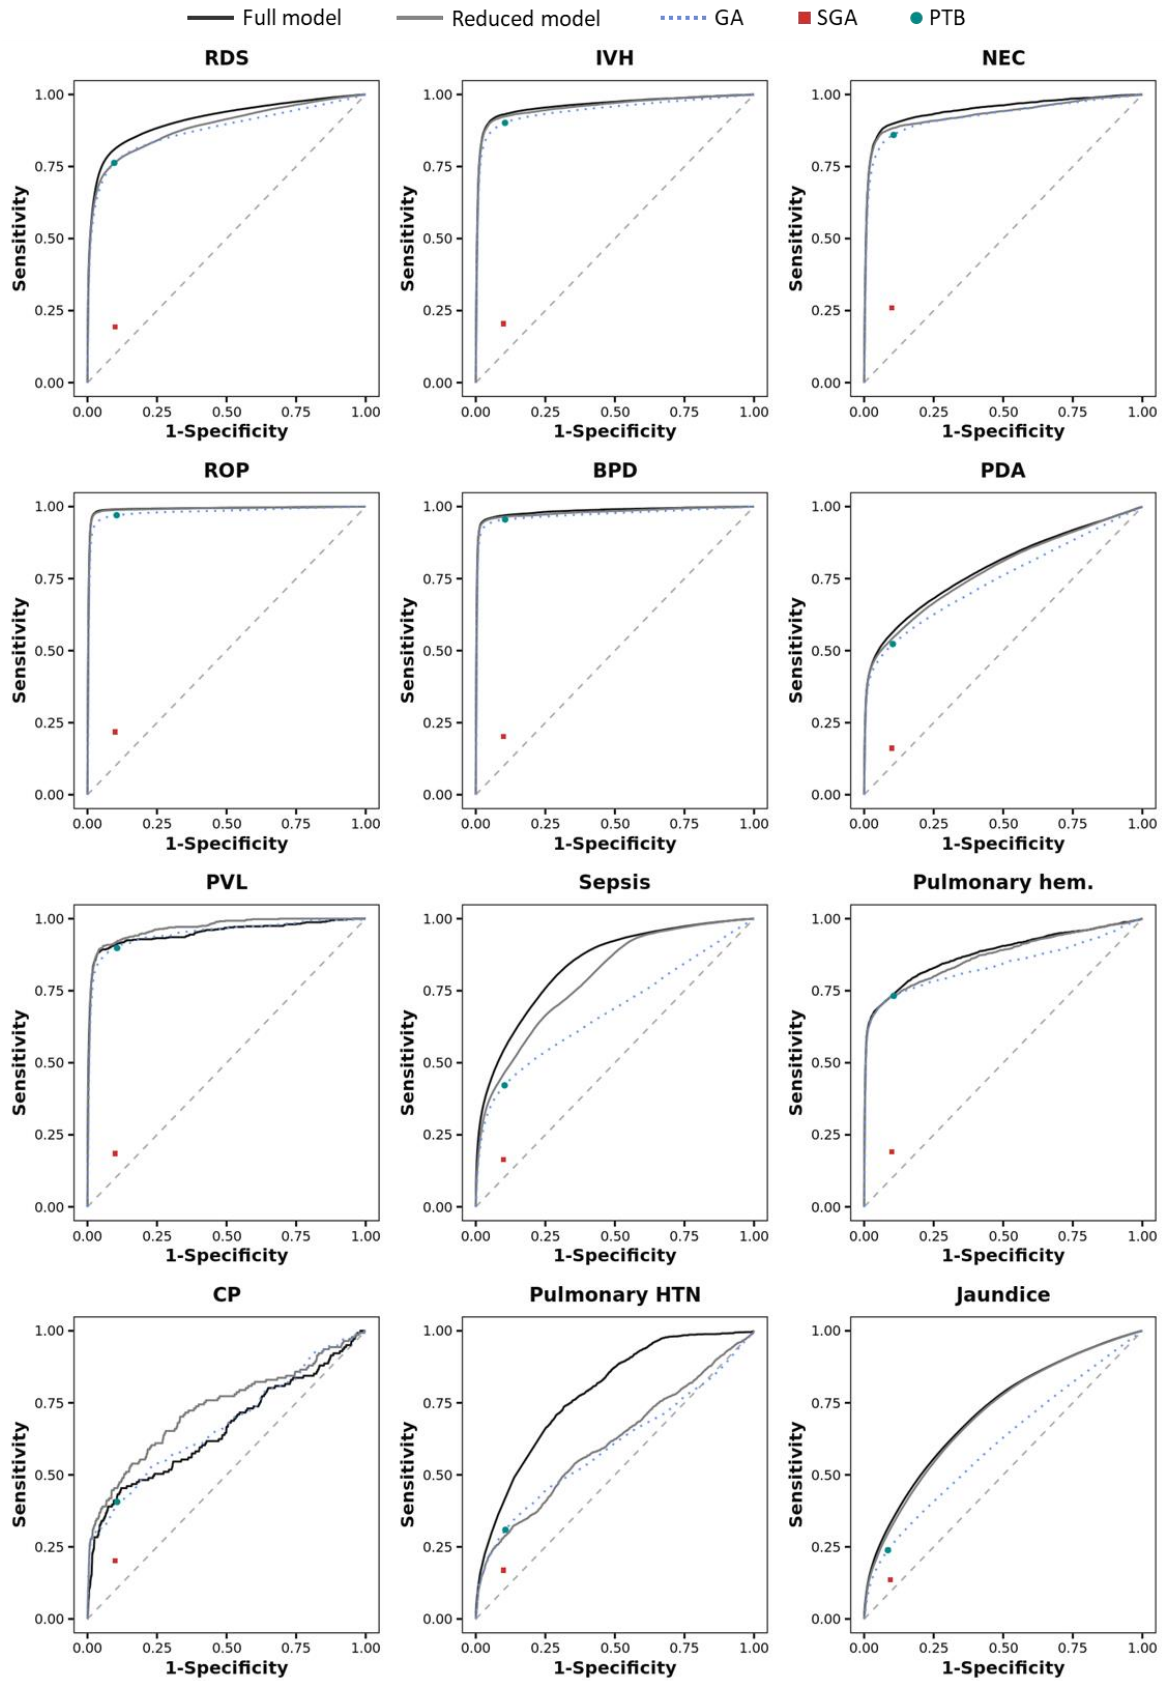

**Supplementary Figure 10. [ROC for each neonatal morbidity, Related to Figure 1]** Receiver operating characteristic (ROC) curves for the full model, the reduced model and the logistic regression models considering gestational age, SGA and PTB.
